# Supplementary material for: Silver-Sulfamethazine-Conjugated β-Cyclodextrin/Dextran-Coated Magnetic Nanoparticles for Pathogen Inhibition
Source: MDPI journal article supplement (doi:10.3390/nano14040371), 2024-02-17
Supplement: s1 [file s1]

# Silver-Sulfamethazine-Conjugated $\beta$ -Cyclodextrin/Dextran-Coated Magnetic Nanoparticles for Pathogen Inhibition

Table S1. Nitrogen, sulfur and phosphorus content in Dex and  $\beta$ -CD derivatives.

| Element<br>Samples   | N<br>(wt.%) | S<br>(wt.%) | P<br>(wt.%) |
|----------------------|-------------|-------------|-------------|
| $\beta$ -CD-Ts       | -           | 2.33        | -           |
| $\beta$ -CD-EA       | 1.20        | -           | -           |
| $\beta$ -CD-VS       | 1.38        | 2.04        | -           |
| Dex-Ts               | -           | 10.07       | -           |
| Dex-EA               | 5.04        | 2.07        | -           |
| Dex- $\beta$ -CD     | 1.63        | 1.67        | -           |
| DPA-Dex- $\beta$ -CD | 1.18        | 1.40        | 6.62        |

$\beta$ -CD-Ts – 6-toluenesulfonyl- $\beta$ -cyclodextrin,  $\beta$ -CD-EA – 6-deoxy-6-hydroxyethylamino- $\beta$ -cyclodextrin,  $\beta$ -CD-VS – 6-deoxy-6-(2-hydroxyethyl) (vinylsulfonyl)methylamino- $\beta$ -cyclodextrin, Dex-Ts – 6-toluenesulfonyl-dextran, Dex-EA – 6-deoxy-6-hydroxyethylamino-dextran and DPA-Dex- $\beta$ -CD – 1,1-diphosphonic acid- $\beta$ -cyclodextrin/dextran.

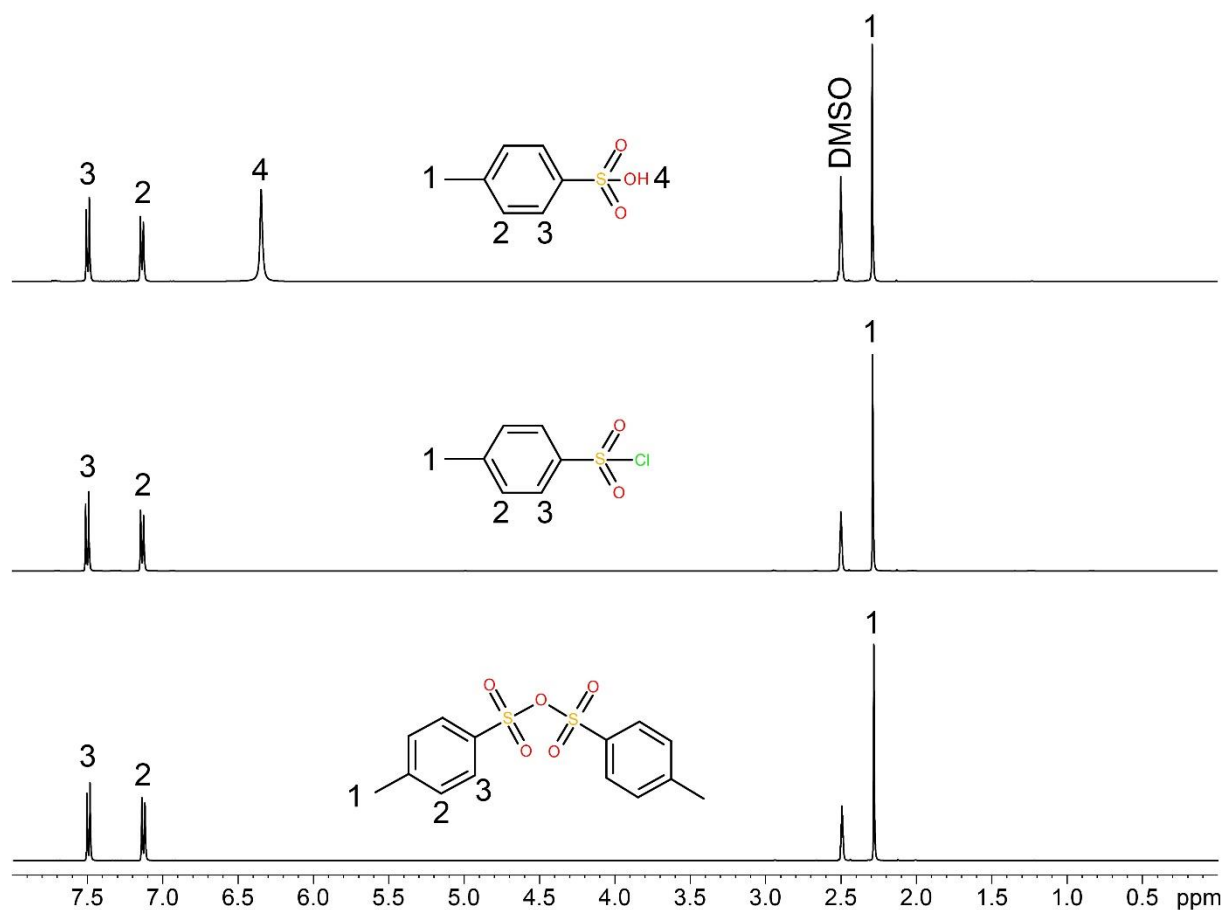

Figure S1.  $^1\text{H}$  NMR spectra of 4-toluenesulfonic acid (TsOH), 4-toluenesulfonyl chloride (TsCl) and 4-toluenesulfonic anhydride (Ts<sub>2</sub>O) in DMSO- $d_6$  at 25 °C.

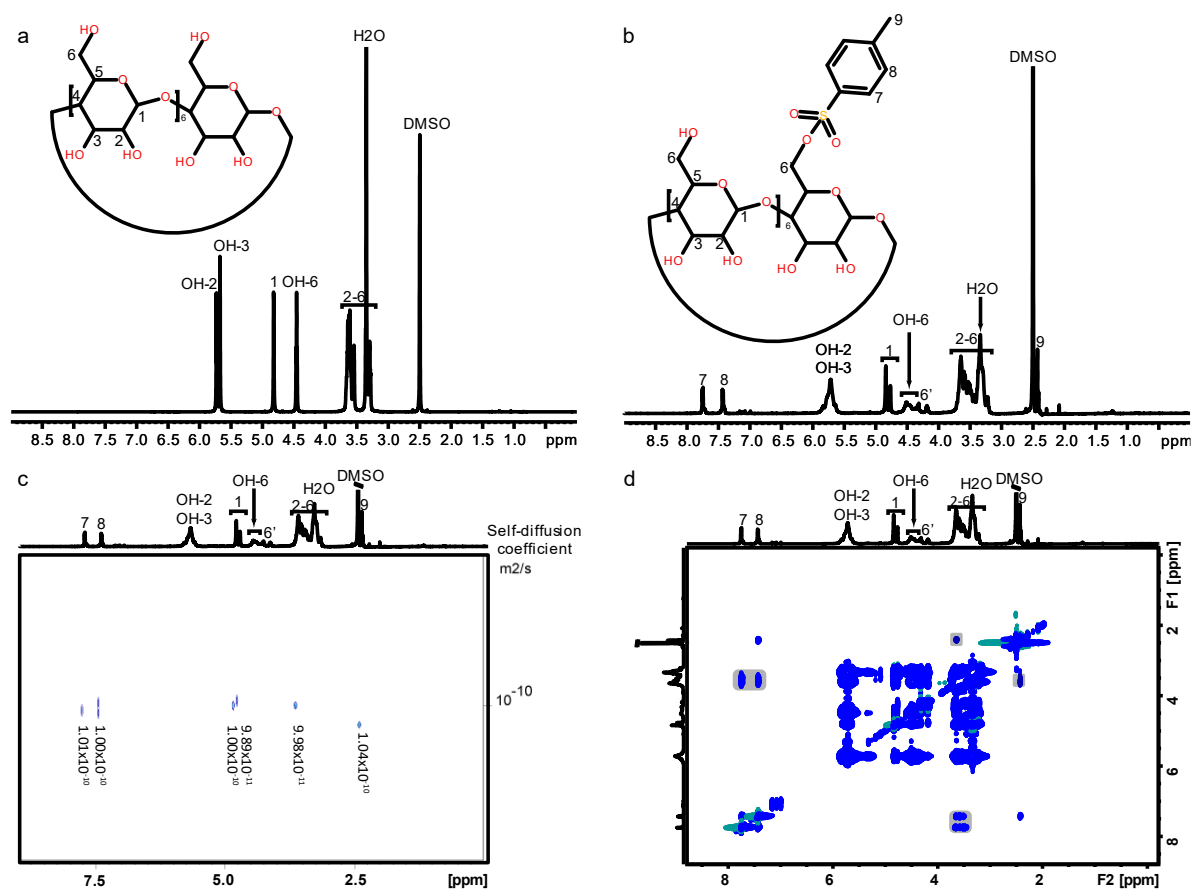

Figure S2.  $^1\text{H}$  NMR spectra of (a)  $\beta$ -cyclodextrin and (b)  $\beta$ -cyclodextrin modified with tosyl groups dissolved in DMSO- $d_6$ , (c)  $^1\text{H}$ - $^1\text{H}$  2D NOESY NMR and (d) 2D DOSY NMR spectra of tosyl-modified  $\beta$ -CD.

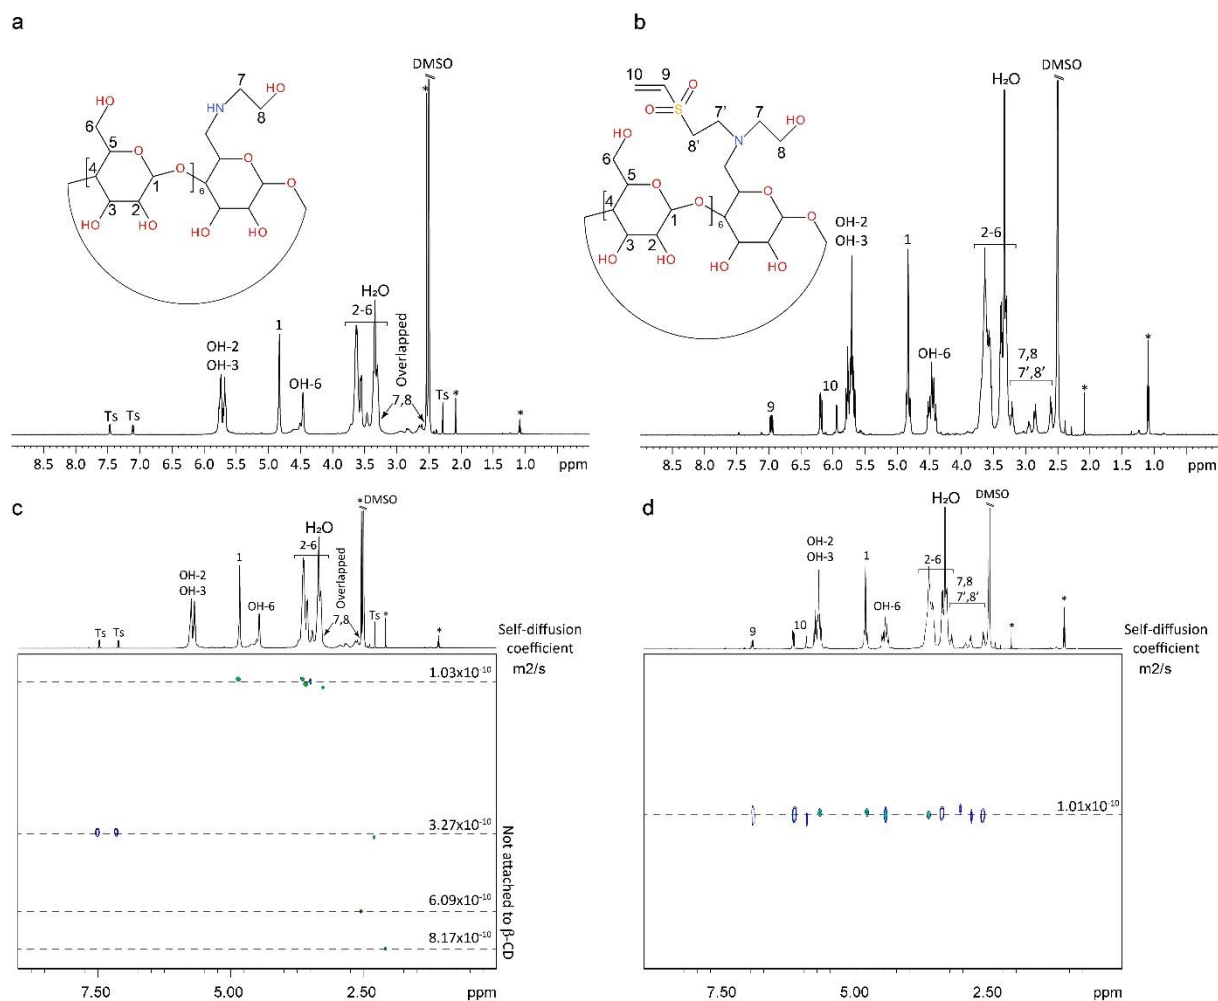

Figure S3. (a, b)  $^1\text{H}$  NMR and (c, d) DOSY NMR spectra of (a, c)  $\beta$ -CD-EA and (b, d)  $\beta$ -CD-VS. Signals denoted by an asterisk (\*) originate from residual solvents used in synthesis. Signals denoted as "Ts" are due to tosyl groups (not attached to  $\beta$ -CD ring).

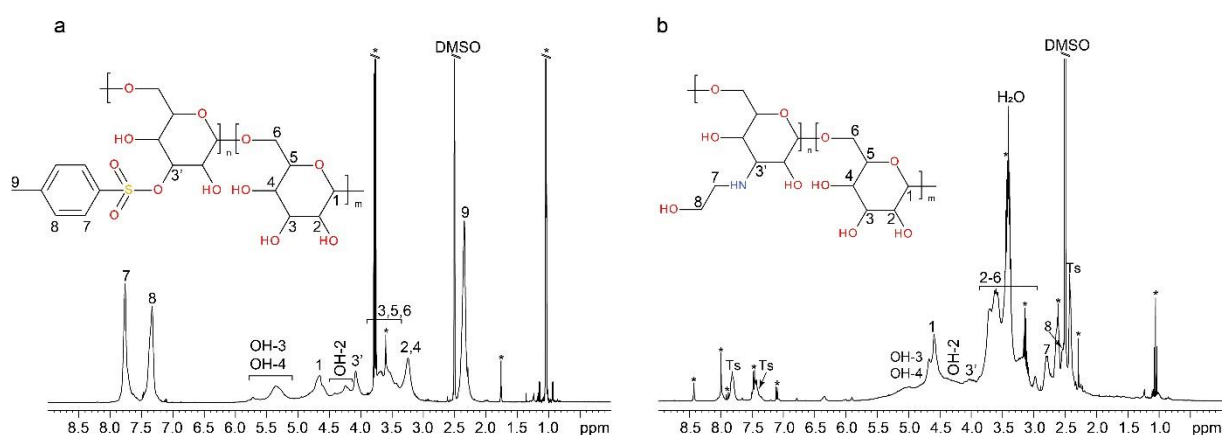

Figure S4.  $^1\text{H}$  NMR spectra of (a) Dex-Ts and (b) Dex-EA. Signals denoted by an asterisk (\*) originate from residual solvents used in synthesis or impurities.

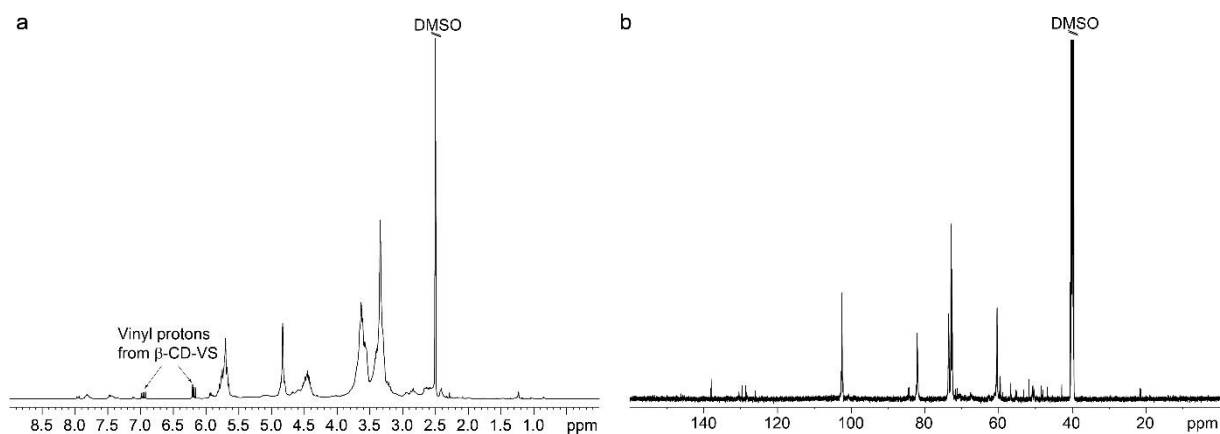

Figure S5. (a)  $^1\text{H}$  NMR spectrum of DPA-Dex- $\beta$ -CD and (b)  $^{13}\text{C}$  NMR spectrum of DPA-Dex- $\beta$ -CD.

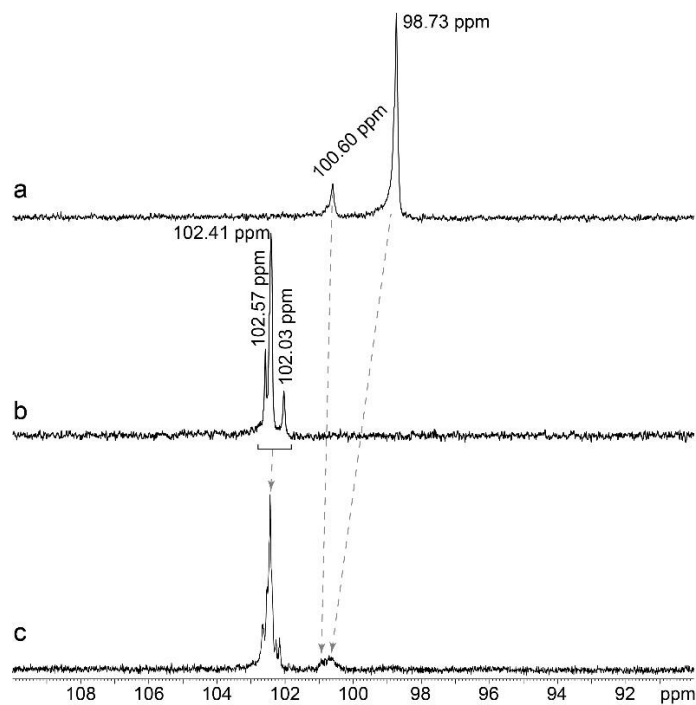

Figure S6.  $^{13}\text{C}$  NMR spectra (90-110 ppm region) of (a) Dex-EA, (b)  $\beta$ -CD-EA and (c) DPA-Dex- $\beta$ -CD.

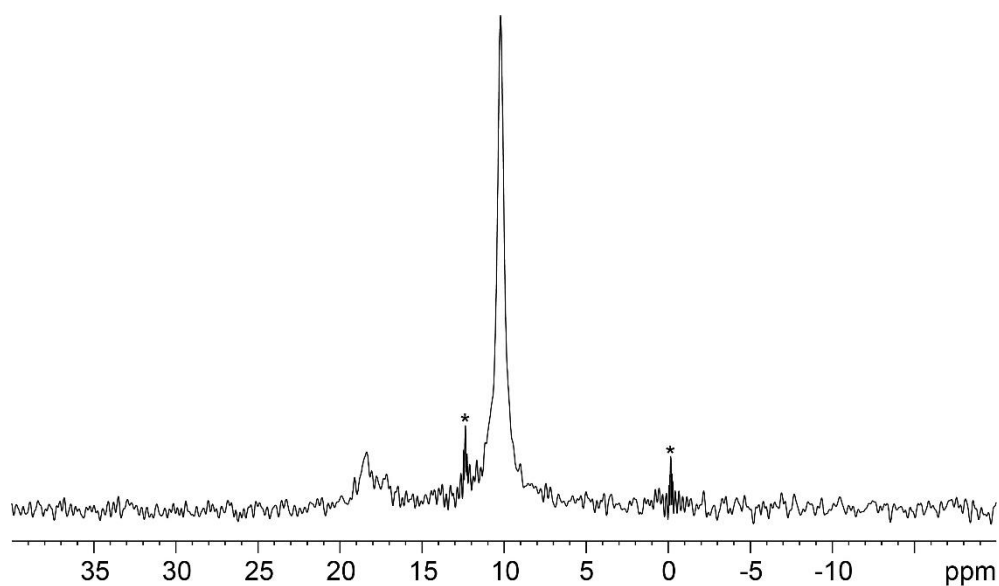

Figure S7.  $^{31}\text{P}$  NMR spectrum of DPA-Dex- $\beta$ -CD. Signals denoted by an asterisk (\*) originate from impurities.

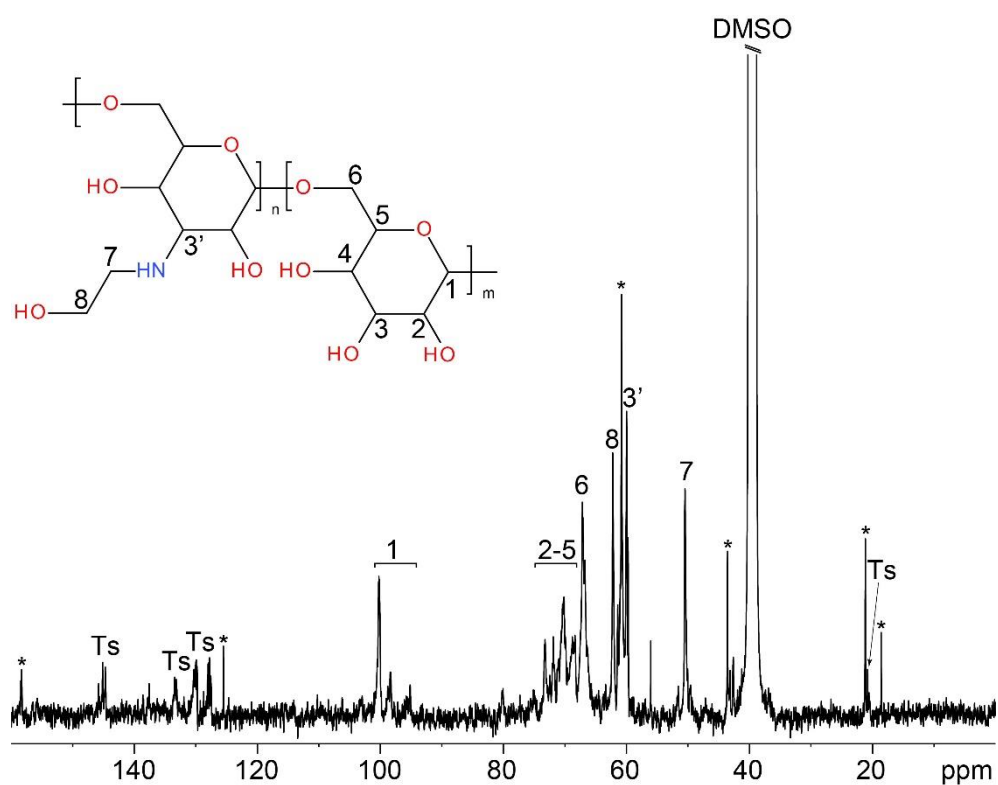

Figure S8.  $^{13}\text{C}$  NMR spectrum of Dex-EA. Signals denoted by an asterisk (\*) originate from residual solvents used in synthesis or impurities. Signals marked as “Ts” are caused by residual tosyl groups.

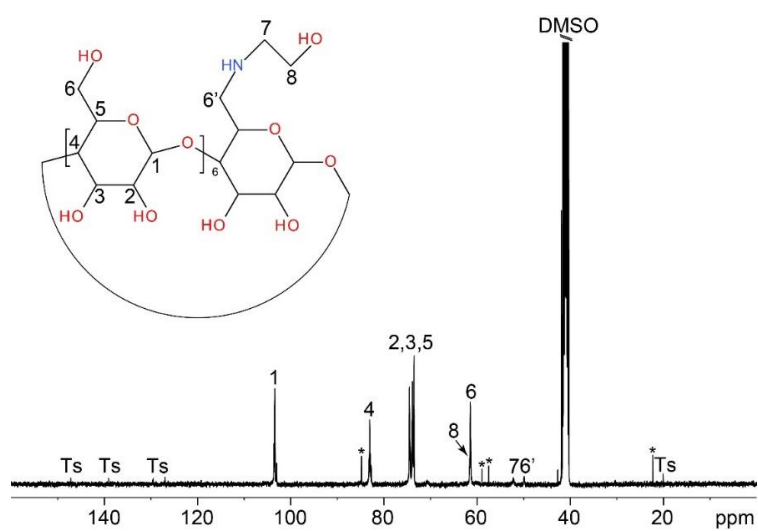

Figure S9.  $^{13}\text{C}$  NMR spectrum of CD-EA. Signals denoted by an asterisk (\*) originate from residual solvents used in synthesis or impurities. Signals marked as "Ts" are due to residual tosyl groups.
